# Supplementary figures and images for: Clostridium ramosum Promotes High-Fat Diet-Induced Obesity in Gnotobiotic Mouse Models
Source: PubMed Central journal article supplement — mBio. 2014 Sep 30;5(5):e01530-14. doi: 10.1128/mBio.01530-14 (PMC4196224; doi:10.1128/mbio.01530-14), 2014-09-30

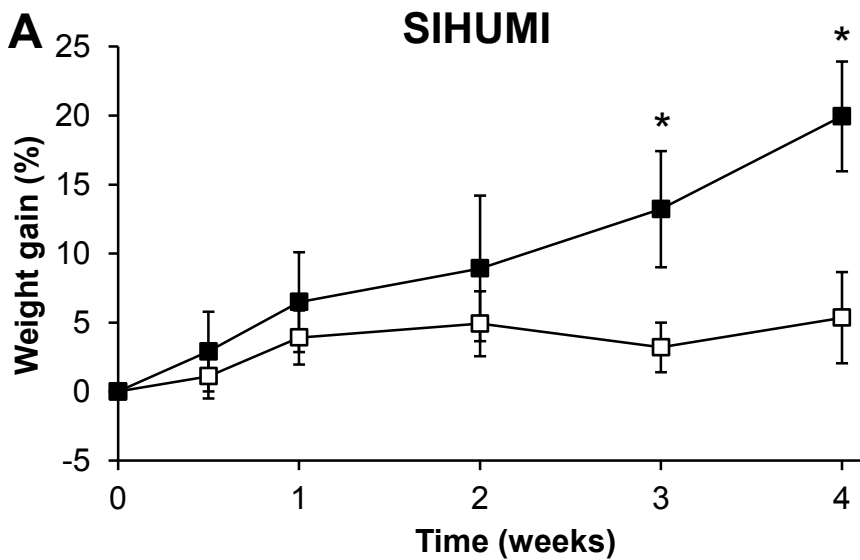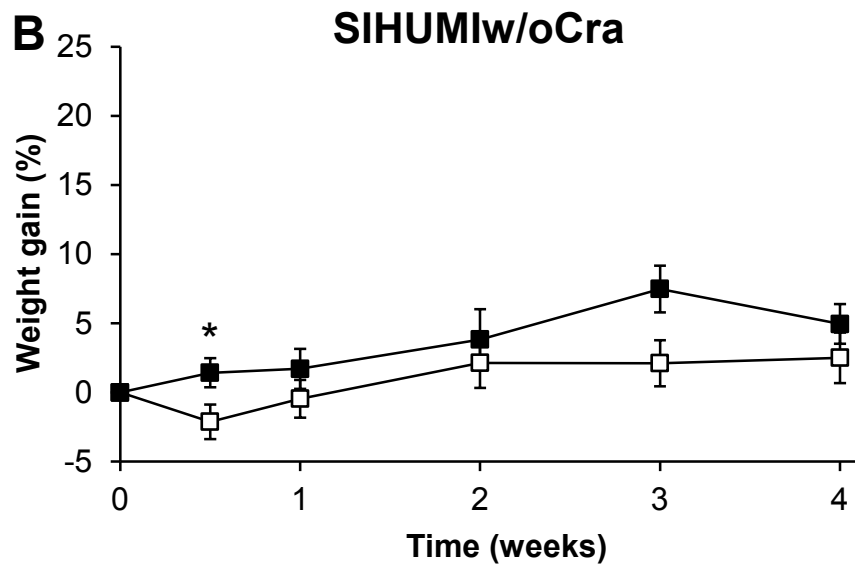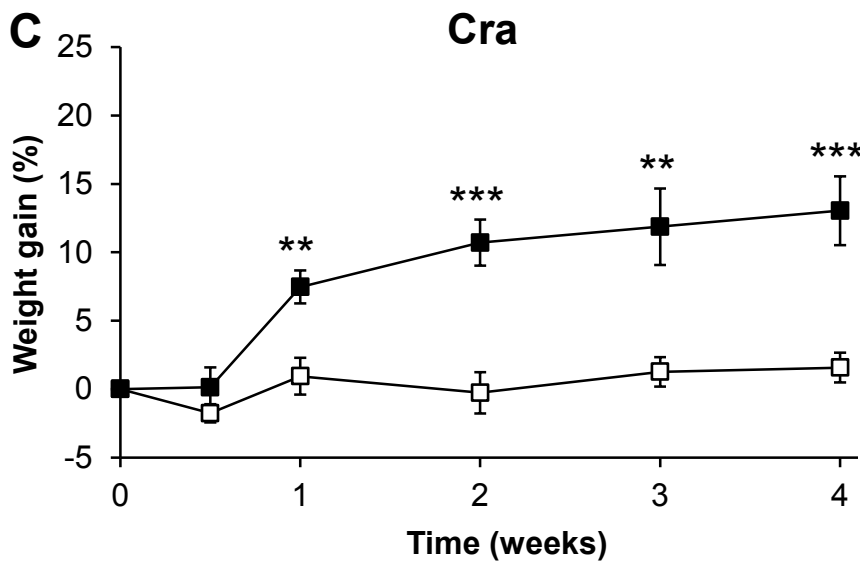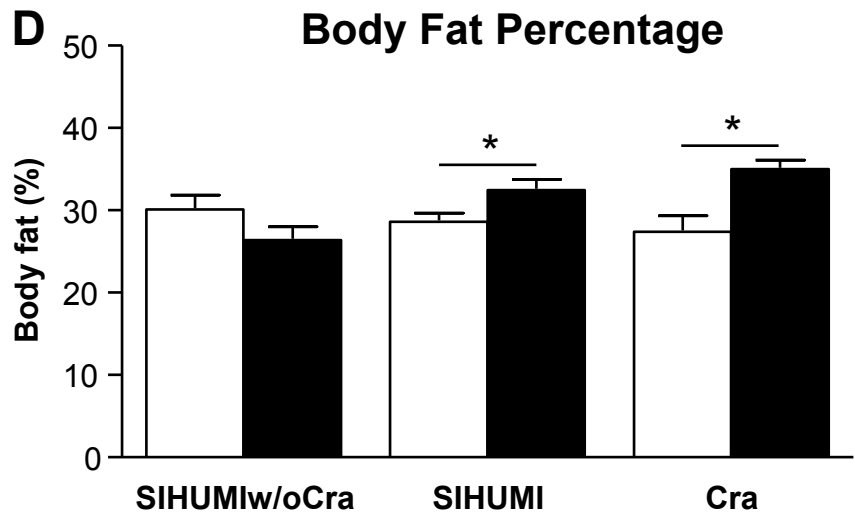

Supplement: mbo005142009sf1.pdf [file mbo005142009sf1.pdf]
